# Supplementary material for: Gene-Metabolite Interaction in the One Carbon Metabolism Pathway: Predictors of Colorectal Cancer in Multi-Ethnic Families
Source: PubMed Central journal article supplement (PMC6164460; doi:10.3390/jpm8030026), 2018-08-06
Supplement: jpm-08-00026-s001.pdf [file jpm-08-00026-s001.pdf]

Supplementary File:

## Gene-Metabolites Interaction in the One Carbon Metabolism Pathway: Predictors of Colorectal Cancer in Multi-Ethnic Families

S. Pamela K. Shiao\*, James Grayson, Chong Ho Yu

\*Corresponding: pshiao@msn.com

**Supplementary Table S1.** Comparisons on demographic factors across racial groups. Nonparametric test, Posthoc by Wilcoxon test.

|             |         | White<br>(n = 10)     | Hispanic<br>(n = 9)   | Asian<br>(n = 9)                      | African<br>(n = 2)     | p     |
|-------------|---------|-----------------------|-----------------------|---------------------------------------|------------------------|-------|
| Gender      | male    | 4 (40%)               | 2 (22%)               | 4 (44%)                               | 1 (50%)                | 0.77  |
|             | female  | 6 (60%)               | 7 (78%)               | 5 (56%)                               | 1 (50%)                |       |
| Age         | years   | 48 ± 15<br>(21 – 70)  | 50 ± 14<br>(29 – 72)  | 47 ± 13<br>(19 – 62)                  | 52 ± 25<br>(34 – 69)   | 0.98  |
| BMI         |         | 30 ± 8.7<br>(21 – 51) | 28 ± 6.5<br>(21 – 43) | 23 ± 2.1<br>(21 – 27)                 | 39 ± 11<br>(31 – 47)   | 0.036 |
|             | posthoc |                       |                       | <White p = 0.03<br><African p = 0.045 |                        |       |
| Weight      | Kg      | 80 ± 26<br>(45 – 138) | 73 ± 15<br>(54 – 109) | 63 ± 6.3<br>(52 – 71)                 | 113 ± 38<br>(86 – 141) | 0.035 |
|             | posthoc |                       |                       | <African p = 0.045                    |                        |       |
| Vegetable   | cups    | 2.1 ± 0.2<br>(1 – 3)  | 1.8 ± 0.2<br>(1 – 1)  | 2.3 ± 0.2<br>(1 – 3)                  | 1.0 ± 0.5<br>(1 – 1)   | 0.093 |
| Fruit       | cups    | 1.2 ± 0.8<br>(0 – 2)  | 1.1 ± 0.8<br>(0 – 2)  | 1.6 ± 0.5<br>(1 – 2)                  | 1.5 ± 0.7<br>(1 – 2)   | 0.59  |
| Whole grain | oz      | 2.2 ± 0.6<br>(1 – 3)  | 1.6 ± 0.5<br>(1 – 2)  | 1.4 ± 0.7<br>(1 – 3)                  | 1.5 ± 0.7<br>(1 – 2)   | 0.071 |
|             | posthoc |                       | <White p = 0.029      | <White p = 0.038                      |                        |       |
| Liquid      | cups    | 5.5 ± 1.4<br>(4 – 8)  | 6.1 ± 1.8<br>(4 – 8)  | 5.4 ± 1.5<br>(4 – 8)                  | 4.5 ± 0.7<br>(4 – 5)   | 0.59  |

BMI: body mass index.

**Supplementary Table S2.** Distribution of gene polymorphisms per control and cancer groups across racial groups.

| <i>n</i> (%)<br>Genotypes | Control Group |         |        |        | <i>p</i><br>(HWE) | Allele<br>Frequency# | Cancer Group |          |         |
|---------------------------|---------------|---------|--------|--------|-------------------|----------------------|--------------|----------|---------|
|                           | 0             | 1       | 2      |        |                   |                      | 0            | 1        | 2       |
| <i>MTHFR 677</i>          | CC            | CT      | TT     |        |                   | % C/T                | CC           | CT       | TT      |
| Total                     | 7 (47)        | 6 (40)  | 2 (13) | NS     |                   | 75/25                | 4 (27)       | 9 (60)   | 2 (13)  |
| White                     | 0 (0)         | 5 (83)  | 1 (17) | NS     |                   | 53/47                | 1 (25)       | 2 (50)   | 1 (25)  |
| Asian                     | 2 (50)        | 1 (25)  | 1 (25) | NS     |                   | 70/30                | 3 (60)       | 1 (20)   | 1 (20)  |
| Hispanic                  | 1 (25)        | 3 (75)  | 0 (0)  | NS     |                   | 55/45                | 2 (40)       | 3 (60)   | 0 (0)   |
| Black                     | 1 (100)       | 0 (0)   | 0 (0)  | –      |                   | 91/9                 | 1 (100)      | 0 (0)    | 0 (0)   |
| <i>MTHFR 1298</i>         | AA            | AC      | CC     |        |                   | % A/C                | AA           | AC       | CC      |
| Total                     | 9 (60)        | 6 (40)  | 0 (0)  | NS     |                   | 75/25                | 11 (73)      | 3 (20)   | 1 (7)   |
| White                     | 5 (83)        | 1 (17)  | 0 (0)  | NS     |                   | 85/15                | 3 (75)       | 1 (25)   | 0 (0)   |
| Asian                     | 3 (75)        | 1 (25)  | 1 (25) | NS     |                   | 78/22                | 3 (60)       | 2 (40)   | 0 (0)   |
| Hispanic                  | 2 (50)        | 1 (25)  | 1 (25) | NS     |                   | 84/16                | 2 (40)       | 3 (60)   | 0 (0)   |
| Black                     | 1 (100)       | 0 (0)   | 0 (0)  | –      |                   | 85/15                | 1 (100)      | 0 (0)    | 0 (0)   |
| <i>MTR 2756</i>           | AA            | AG      | GG     |        |                   | % A/G                | AA           | AG       | GG      |
| Total                     | 9 (60)        | 4 (27)  | 2 (13) | NS     |                   |                      | 7 (46.7)     | 7 (46.7) | 1 (6.7) |
| White                     | 2 (33)        | 3 (50)  | 1 (17) | NS     |                   | 84/16                | 2 (50)       | 1 (25)   | 1 (25)  |
| Asian                     | 2 (50)        | 2 (50)  | 0 (0)  | NS     |                   | 65-91/9-35           | 2 (40)       | 2 (40)   | 1 (20)  |
| Hispanic                  | 3 (75)        | 1 (25)  | 0 (0)  | NS     |                   | 19/81                | 5 (100)      | 0 (0)    | 0 (0)   |
| Black                     | 0 (0)         | 1 (100) | 0 (0)  | NS     |                   | 30-37/63-70          | 0 (0)        | 1 (100)  | 0 (0)   |
| <i>MTRR 66</i>            | AA            | AG      | GG     |        |                   | % A/G                | AA           | AG       | GG      |
| Total                     | 8 (57)        | 3 (21)  | 3 (21) | NS     |                   | 64/36                | 7 (47)       | 5 (33)   | 3 (20)  |
| White                     | 2 (33)        | 3 (50)  | 1 (17) | NS     |                   | 45/55                | 0 (0)        | 1 (25)   | 3 (75)  |
| Asian                     | 2 (50)        | 1 (25)  | 1 (25) | NS     |                   | 74/26                | 2 (50)       | 2 (50)   | 0 (0)   |
| Hispanic                  | 3 (75)        | 0 (0)   | 1 (25) | 0.0455 |                   | 72/28                | 5 (100)      | 0 (0)    | 0 (0)   |
| Black                     | 0 (0)         | 1 (100) | 0 (0)  | NS     |                   | 73/27                | 1 (0)        | 0 (0)    | 0 (0)   |
| <i>DHFR 19 bp</i>         | II            | ID      | DD     |        |                   | % I/D                | II           | ID       | DD      |
| Total                     | 6 (40)        | 6 (40)  | 3 (20) | NS     |                   | 50/50                | 3 (20)       | 6 (40)   | 6 (40)  |
| White                     | 1 (17)        | 3 (50)  | 2 (33) | NS     |                   | 45-47/53-55          | 2 (50)       | 0 (0)    | 2 (50)  |
| Asian                     | 0 (0)         | 2 (50)  | 2 (50) | NS     |                   | 63/37                | 2 (40)       | 3 (60)   | 0 (0)   |
| Hispanic                  | 1 (25)        | 1 (25)  | 2 (50) | NS     |                   | 58/42                | 1 (20)       | 3 (60)   | 1 (20)  |
| Black                     | 1 (100)       | 0 (0)   | 0 (0)  | –      |                   | 55/45                | 1 (100)      | 0 (0)    | 0 (0)   |

HWE: Hardy-Weinberg Equilibrium; *MTHFR*: *methylene tetrahydrofolate reductase*; *MTR*: *methionine synthase*; *MTRR*: *methionine synthase reductase*; *DHFR*: *dihydrofolate reductase*; NS: Not significant; --: cannot be calculated; HWE Calculator: [http://www.bioinformatics.org/forums/forum.php?forum\\_id=3196](http://www.bioinformatics.org/forums/forum.php?forum_id=3196); #Population Allele Frequencies from: <http://useast.ensembl.org/index.html>; <https://www.cdc.gov/genomics/population/genvar/frequencies/mthfr.htm>.

**Supplementary Table S3.** Comparisons on metabolites in blood plasma among racial groups.

|                        | White<br>(n = 10)        | Hispanic<br>(n = 9)                                  | Asian<br>(n = 9)            | African<br>(n = 2)       | <i>p</i> |
|------------------------|--------------------------|------------------------------------------------------|-----------------------------|--------------------------|----------|
| Homocysteine<br>µmol/L | 8.3 ± 4.5<br>(4.2 – 17)  | 6.6 ± 3<br>(3.2 – 12)                                | 6.2 ± 3.3<br>(3.1 – 14)     | 5.6 ± 0.4<br>(5.3 – 5.9) | 0.72     |
| SAM<br>nmol/L          | 99 ± 20<br>(74 – 134)    | 94 ± 16<br>(70 – 125)                                | 108 ± 53<br>(63 – 233)      | 93 ± 1.2<br>(92 – 94)    | 0.96     |
| SAH<br>nmol/L          | 27 ± 12<br>(11 – 56)     | 21 ± 5.6<br>(12 – 29)                                | 41 ± 39<br>(16 – 142)       | 38 ± 14<br>(27 – 47)     | 0.17     |
| SAM/SAH Ratio          | 4.1 ± 1.1<br>(2.4 – 6.3) | 4.7 ± 1.0<br>(3.4 – 6.3)                             | 3.2 ± 1.0<br>(1.6 – 4.4)    | 2.7 ± 1.0<br>(2.0 – 3.4) | 0.031    |
|                        | Posthoc                  |                                                      | < Hispanic <i>p</i> = 0.012 |                          |          |
| ADMA<br>nmol/L         | 531 ± 89<br>(435 – 754)  | 626 ± 232<br>(278 – 917)                             | 534 ± 92<br>(393 – 697)     | 574 ± 9.2<br>(567 – 580) | 0.57     |
| SDMA<br>nmol/L, -324   | 503 ± 96<br>(401 – 686)  | 700 ± 523<br>(349 – 2050)                            | 479 ± 133<br>(324 – 778)    | 511 ± 21<br>(496 – 526)  | 0.58     |
| Methionine<br>nmol/L   | 28 ± 5.3<br>(18 – 35)    | 29 ± 6.6<br>(18 – 38)                                | 34 ± 10<br>(20 – 51)        | 28 ± 5.1<br>(24 – 31)    | 0.49     |
| MMA<br>nmol/L          | 288 ± 98<br>(178 – 521)  | 276 ± 96<br>(185 – 480)                              | 322 ± 246<br>(205 – 972)    | 199 ± 18<br>(186 – 211)  | 0.31     |
| Betaine<br>nmol/L      | 56 ± 10<br>(37 – 68)     | 49 ± 12<br>(36 – 75)                                 | 78 ± 20<br>(47 – 111)       | 60 ± 1.4<br>(59 – 61)    | 0.0098   |
|                        | Posthoc                  | <White <i>p</i> = 0.016<br>< Asian <i>p</i> = 0.0047 |                             |                          |          |
| Vitamin B-6<br>nmol/L  | 82 ± 40<br>(29 – 155)    | 46 ± 30<br>(14 – 109)                                | 41 ± 20<br>(5.3 – 67)       | 22 ± 2.9<br>(20 – 24)    | 0.028    |
|                        | Posthoc                  | <White, <i>p</i> = 0.025                             | <White, <i>p</i> = 0.0455   | <White, <i>p</i> = 0.041 |          |
| 5-MTHF nmol/L          | 45 ± 15<br>(31 – 78)     | 40 ± 24<br>(18 – 97)                                 | 34 ± 7.4<br>(25 – 48)       | 41 ± 1.6<br>(40 – 43)    | 0.24     |
| Choline<br>nmol/L      | 9.7 ± 3.2<br>(5.7 – 18)  | 9.7 ± 1.7<br>(7.4 – 12)                              | 13 ± 6.6<br>(6.9 – 27)      | 9.9 ± 0.8<br>(9.3 – 10)  | 0.59     |

Nonparametric test, Posthoc by Wilcoxon test. SAM: S-adenosylmethionine; SAH: S-adenosylhomocysteine; ADMA: Asymmetric dimethylarginine; SDMA: symmetric dimethylarginine; MMA: Methylmalonic acid; 5-MTHF: 5-methyltetrahydrofolate or methylfolate.

**Supplementary Table S4.** Bootstrap forest analysis of three domains and significant parameters included in the prediction model: (a) gene parameters, (b) metabolites, (c) top demographic and lifestyle parameters, (d) most significant parameters of three domains.

(a) Gene parameters

| Term                 | Number of Splits | $G^2$ |  | Portion |
|----------------------|------------------|-------|--|---------|
| Total mutation > 4   | 16               | 0.34  |  | 0.22    |
| <i>DHFR</i> 19bp del | 23               | 0.33  |  | 0.21    |
| <i>MTRR</i> A66G     | 27               | 0.25  |  | 0.16    |
| <i>MTR</i> A2756G    | 21               | 0.19  |  | 0.12    |
| <i>MTHFR</i> d50     | 14               | 0.16  |  | 0.11    |
| <i>MTHFR</i> C677T   | 12               | 0.16  |  | 0.10    |
| <i>MTHFR</i> A1298C  | 16               | 0.13  |  | 0.08    |

(b) Metabolites

| Term              | Number of Splits | $G^2$ | Column Contribution | Portion |
|-------------------|------------------|-------|---------------------|---------|
| Homocysteine 7    | 25               | 1.59  |                     | 0.24    |
| MMA 300           | 30               | 1.35  |                     | 0.20    |
| SAM 90            | 27               | 0.75  |                     | 0.11    |
| Betaine 60        | 22               | 0.72  |                     | 0.11    |
| <i>MTHF</i> 40    | 19               | 0.48  |                     | 0.07    |
| Methionine 30     | 19               | 0.44  |                     | 0.03    |
| SAH 27            | 19               | 0.38  |                     | 0.06    |
| SDMA 400          | 9                | 0.29  |                     | 0.04    |
| Ratio SAM/SAH 4   | 15               | 0.23  |                     | 0.03    |
| Vitamin B6 55     | 14               | 0.15  |                     | 0.02    |
| Cystathionine 290 | 12               | 0.14  |                     | 0.02    |
| Choline 10        | 14               | 0.13  |                     | 0.02    |
| ADMA 400          | 1                | 0.03  |                     | 0.004   |

(c) Top demographic and lifestyle parameters

| Term               | Number of Splits | $G^2$ |  | Portion |
|--------------------|------------------|-------|--|---------|
| age 51             | 25               | 1.53  |  | 0.52    |
| fruit intake       | 30               | 0.40  |  | 0.13    |
| Sex                | 28               | 0.39  |  | 0.13    |
| BMI overweight     | 17               | 0.32  |  | 0.11    |
| vegetable intake   | 16               | 0.14  |  | 0.05    |
| Whole grain intake | 16               | 0.12  |  | 0.04    |
| liquid intake      | 18               | 0.06  |  | 0.02    |

(d) Most significant parameters of three domains

| Term               | Number of Splits | $G^2$ |  | Portion |
|--------------------|------------------|-------|--|---------|
| Homocysteine 7     | 28               | 1.85  |  | 0.35    |
| age 51             | 26               | 1.23  |  | 0.23    |
| Total mutation > 4 | 33               | 0.83  |  | 0.16    |
| <i>MTHF</i> 40     | 32               | 0.71  |  | 0.13    |
| MMA 300            | 14               | 0.57  |  | 0.11    |
| Vegetable intake   | 24               | 0.09  |  | 0.02    |

Prediction Profiler

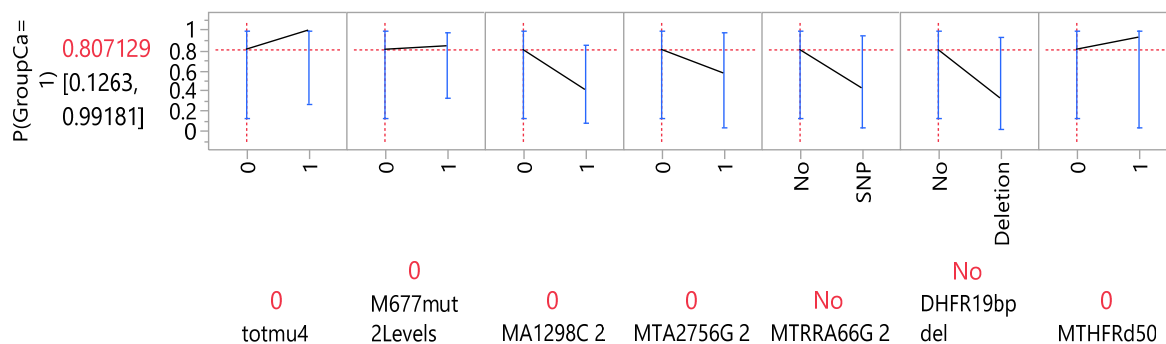

Interaction Profiles

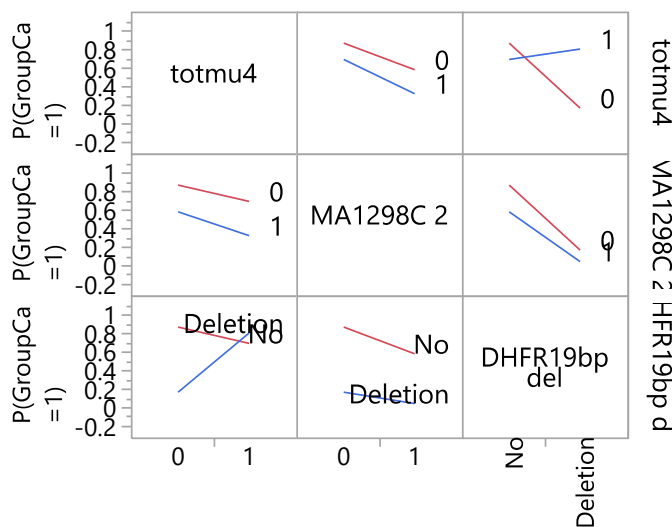

**Supplementary Figure S1.** Gene parameters: total gene mutation >4 (totmu4), *MTHFR* (methylenetetrahydrofolate reductase) C677T, *MTHFR* A1298C, *MTR* (methionine synthase) A2756G, *MTRR* (methionine synthase reductase) A66G, *DHFR* (dihydrofolate reductase) 19 bp deletion, and *MTHFR* deficiency >50% calculated from *MTHFR* 677 T and 1298 C alleles: (a). prediction profiler, (b) examples of interaction profiles on *DHFR* 19 bp deletion interacting with total gene mutation > 4 in association with probability of cancer status [ $p(\text{GroupCa}=1)$ ].
